# Supplementary material
Source: publisher figshare collection journal article supplement (https://acs.figshare.com/ndownloader/files/8806036)
Supplement: Supplementary file 1 [file 8806036]

## Supporting Information

### *“Encapsulation and fluidisation maintains the viability and glucose sensitivity of beta-cells”*

Niusha Nikraves<sup>1\*</sup>, Sophie C. Cox<sup>1</sup>, Marianne J. Ellis<sup>2</sup>, and Liam M. Grover<sup>1</sup>

#### **Affiliations:**

<sup>1</sup> School of Chemical Engineering, University of Birmingham, Birmingham, B15 2TT, UK

<sup>2</sup> School of chemical engineering, University of Bath, Bath, BA2 7AY

\* Corresponding author, Email: [nxn372@student.bham.ac.uk](mailto:nxn372@student.bham.ac.uk)

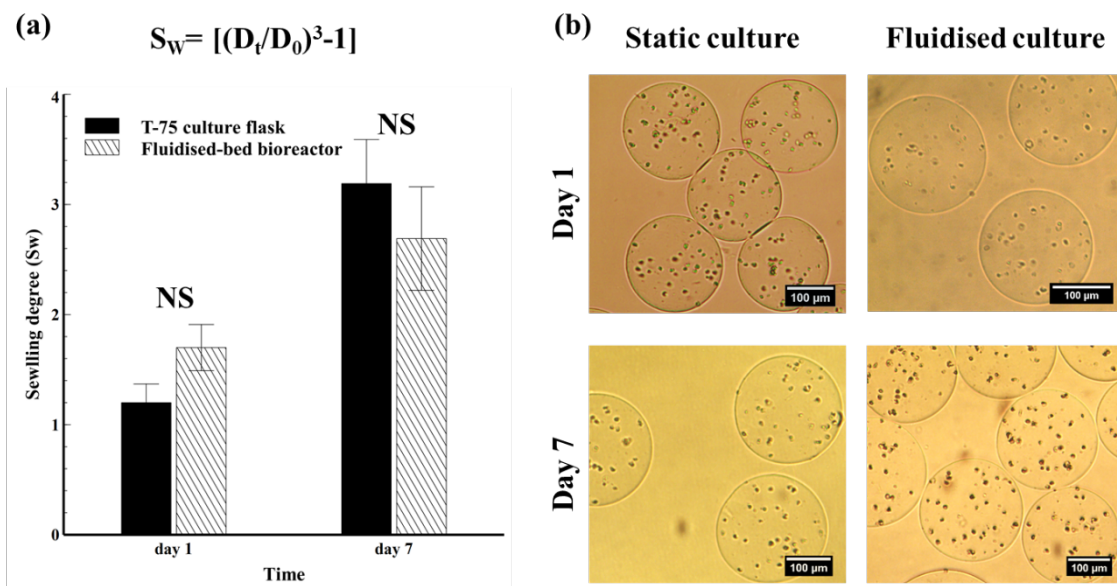

**Supplementary fig 1. (a)** Comparison of the swelling degree ( $D_0$  indicates average diameters of alginate microparticles on day 0, and,  $D_t$  indicates average diameter on day 1 or 7) of cultured cellular alginate microcapsules under static and fluidised (flow rate= 2000  $\mu\text{L}/\text{min}$ ) conditions on days 1 (NS,  $P=0.053$ ) and 7 (NS,  $P=0.69$ ), (particles number = 50). **(b)** Optical micrographs of MIN-6 pancreatic cells embedded within alginate microcapsules cultured for 7 days in a fluidised-bed bioreactor and T-75 cell culture flask. Scale bars = 100  $\mu\text{m}$ . NS=non-significant.

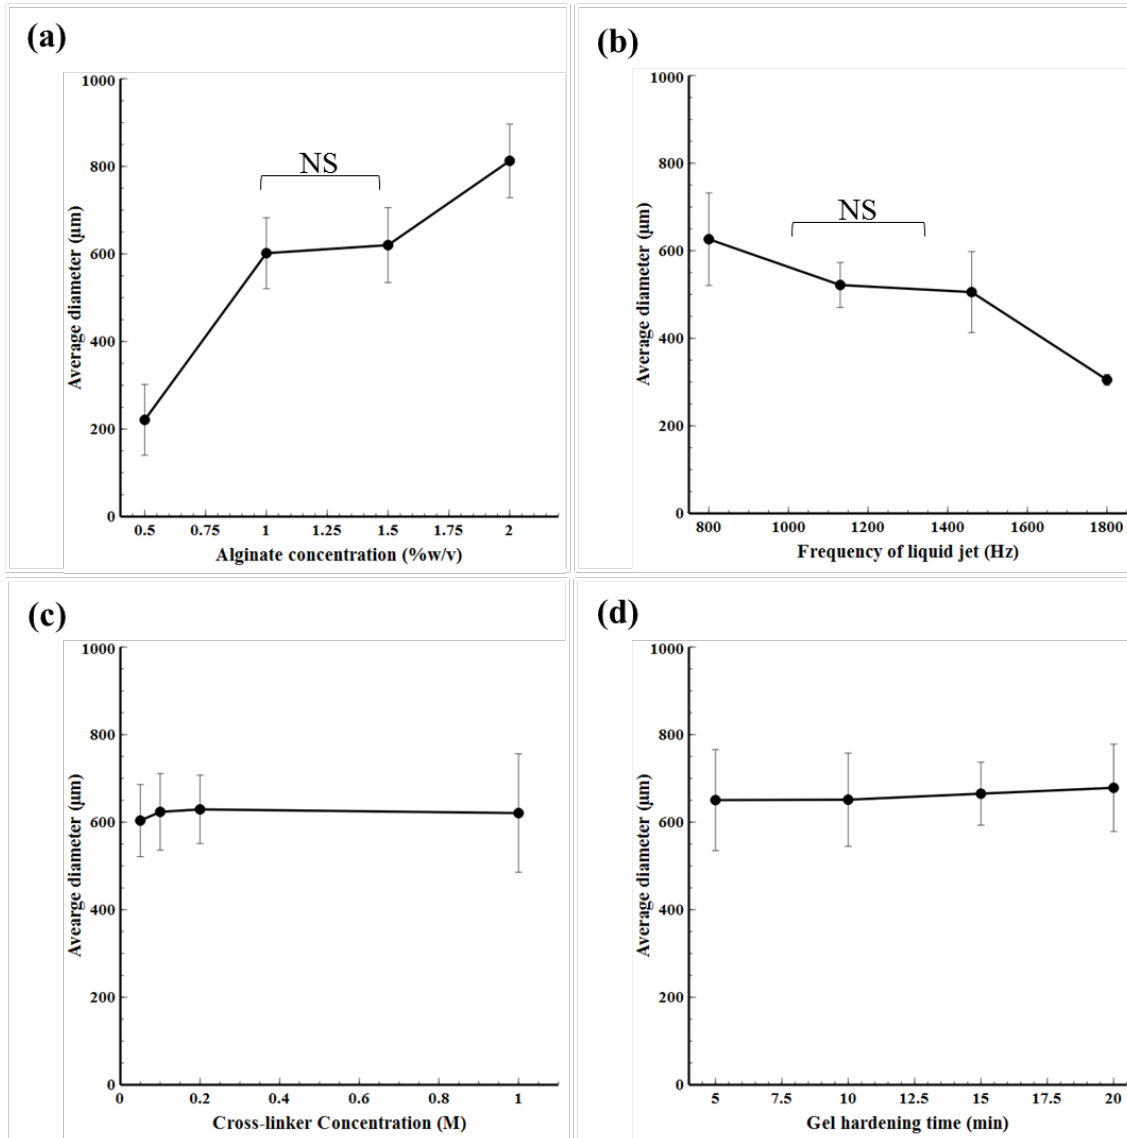

**Supplemental Figure 2.** Effect of individual processing parameters on average diameter and size distribution of alginate microparticles, produced by vibrating nozzle technology (nozzle inner diameter: 120 μm). **(a)** Alginate concentration 0.5-2% w/v ( $P < 0.01$ ) (frequency=1000 Hz,  $\text{CaCl}_2$ =0.1 M, hardening time=10 min), **(b)** Frequency of vibrating nozzle 800-1800 Hz ( $P < 0.01$ ) (alginate concentration=1%,  $\text{CaCl}_2$ =0.1 M, hardening time=10 min), **(c)** Cross-linked solution concentration 0.05-1 M ( $P > 0.05$ ) (alginate concentration=1%, frequency=1000 Hz, hardening time=10 min), **(d)** Gel hardening time 5-20 min ( $P > 0.05$ ) (alginate concentration=1%, frequency=1000 Hz,  $\text{CaCl}_2$ =0.1 M). Results are presented as mean  $\pm$  S.D. (number of microparticles = 20). In each experiment, a single processing parameter was varied and all others were constant, NS = non-significant.
